# Supplementary material for: Carbonaceous material export from Siberian permafrost tracked across the Arctic Shelf using Raman spectroscopy
Source: Copernicus journal article supplement (doi:10.5194/tc-12-3293-2018), 2018-10-11
Supplement: Supplementary file 3 [file tc-12-3293-2018-supplement.zip]

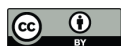

## *Supplement of*

# **Carbonaceous material export from Siberian permafrost tracked across the Arctic Shelf using Raman spectroscopy**

**Robert B. Sparkes et al.**

*Correspondence to:* Robert B. Sparkes (r.sparkes@mmu.ac.uk)

- tc-12-3293-2018-supplement-title-page.pdf
- tc-2018-16-supplement-version4
  - Supplementary Information
    - \* Sample Metadata.xlsx
    - \* Supplementary Figure S1.pdf
    - \* Supplementary Figure S2.pdf
    - \* Supplementary Figure S3.pdf
    - \* Supplementary Figure S4.pdf
    - \* Supplementary Figure S5.pdf

The copyright of individual parts of the supplement might differ from the CC BY 4.0 License.
