# Supplementary figures and images for: Carbonaceous material export from Siberian permafrost tracked across the Arctic Shelf using Raman spectroscopy
Source: Copernicus journal article supplement (doi:10.5194/tc-12-3293-2018), 2018-10-11

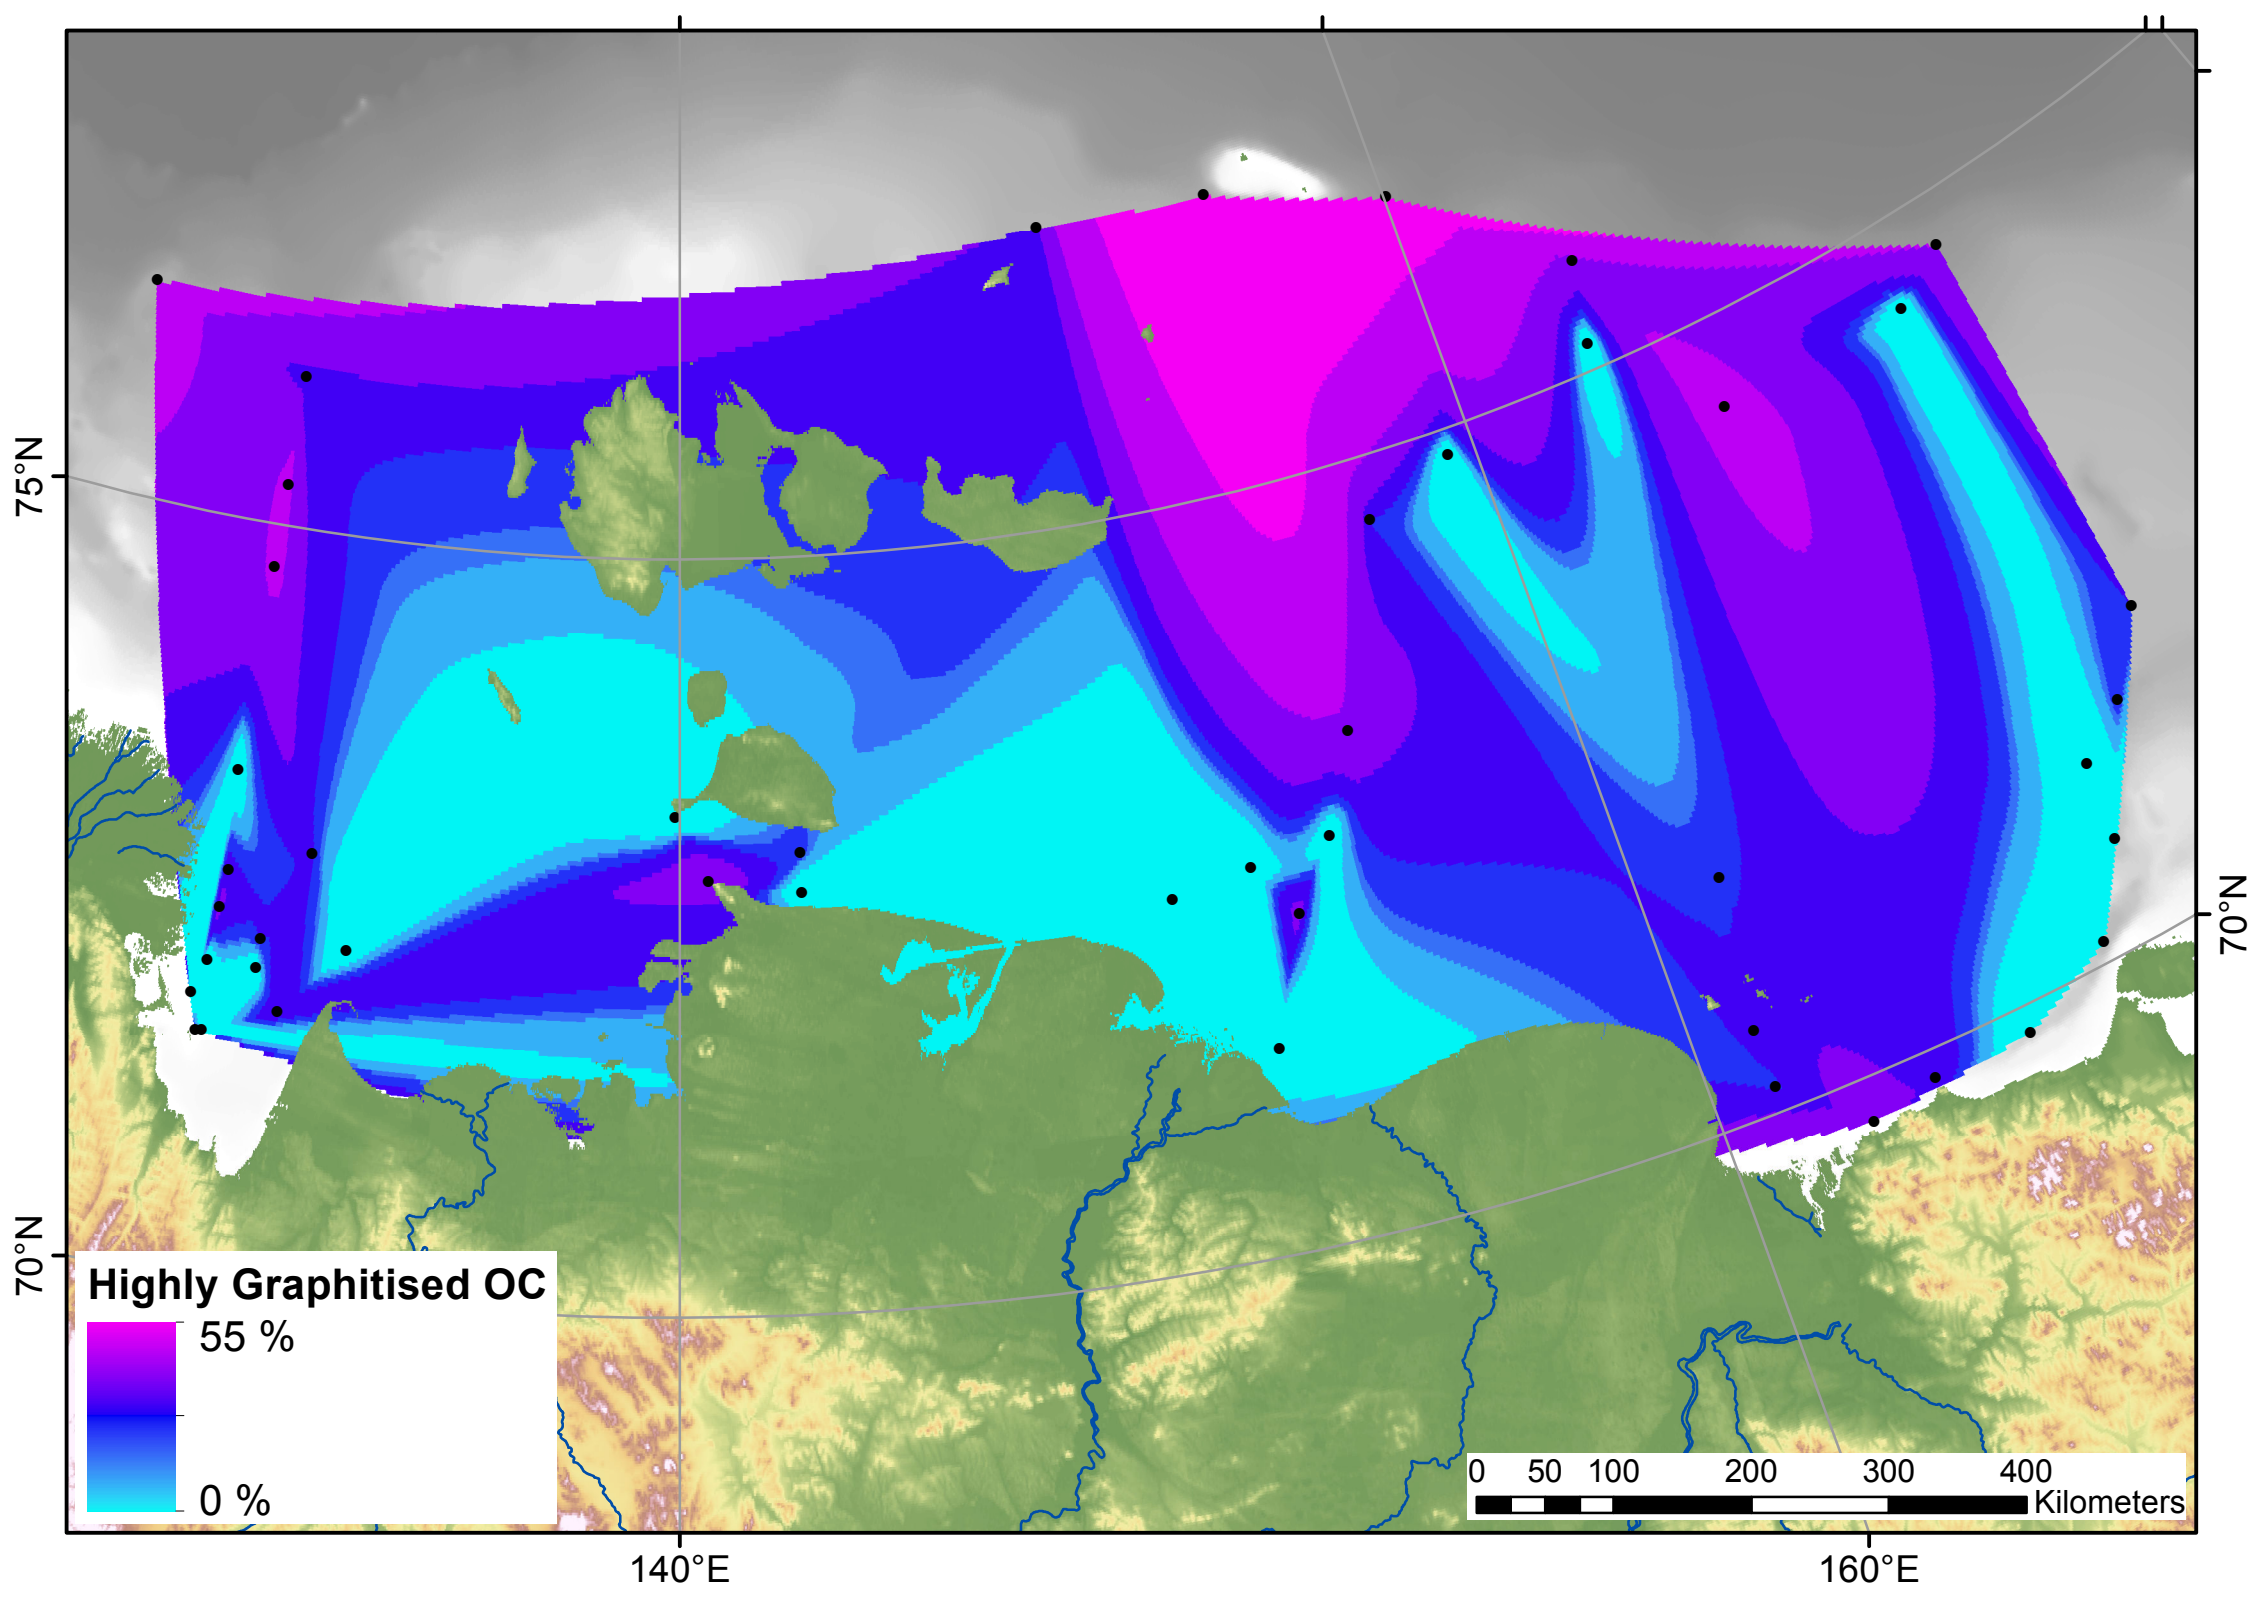

Supplement: Supplementary file 1 [file tc-12-3293-2018-supplement.zip]

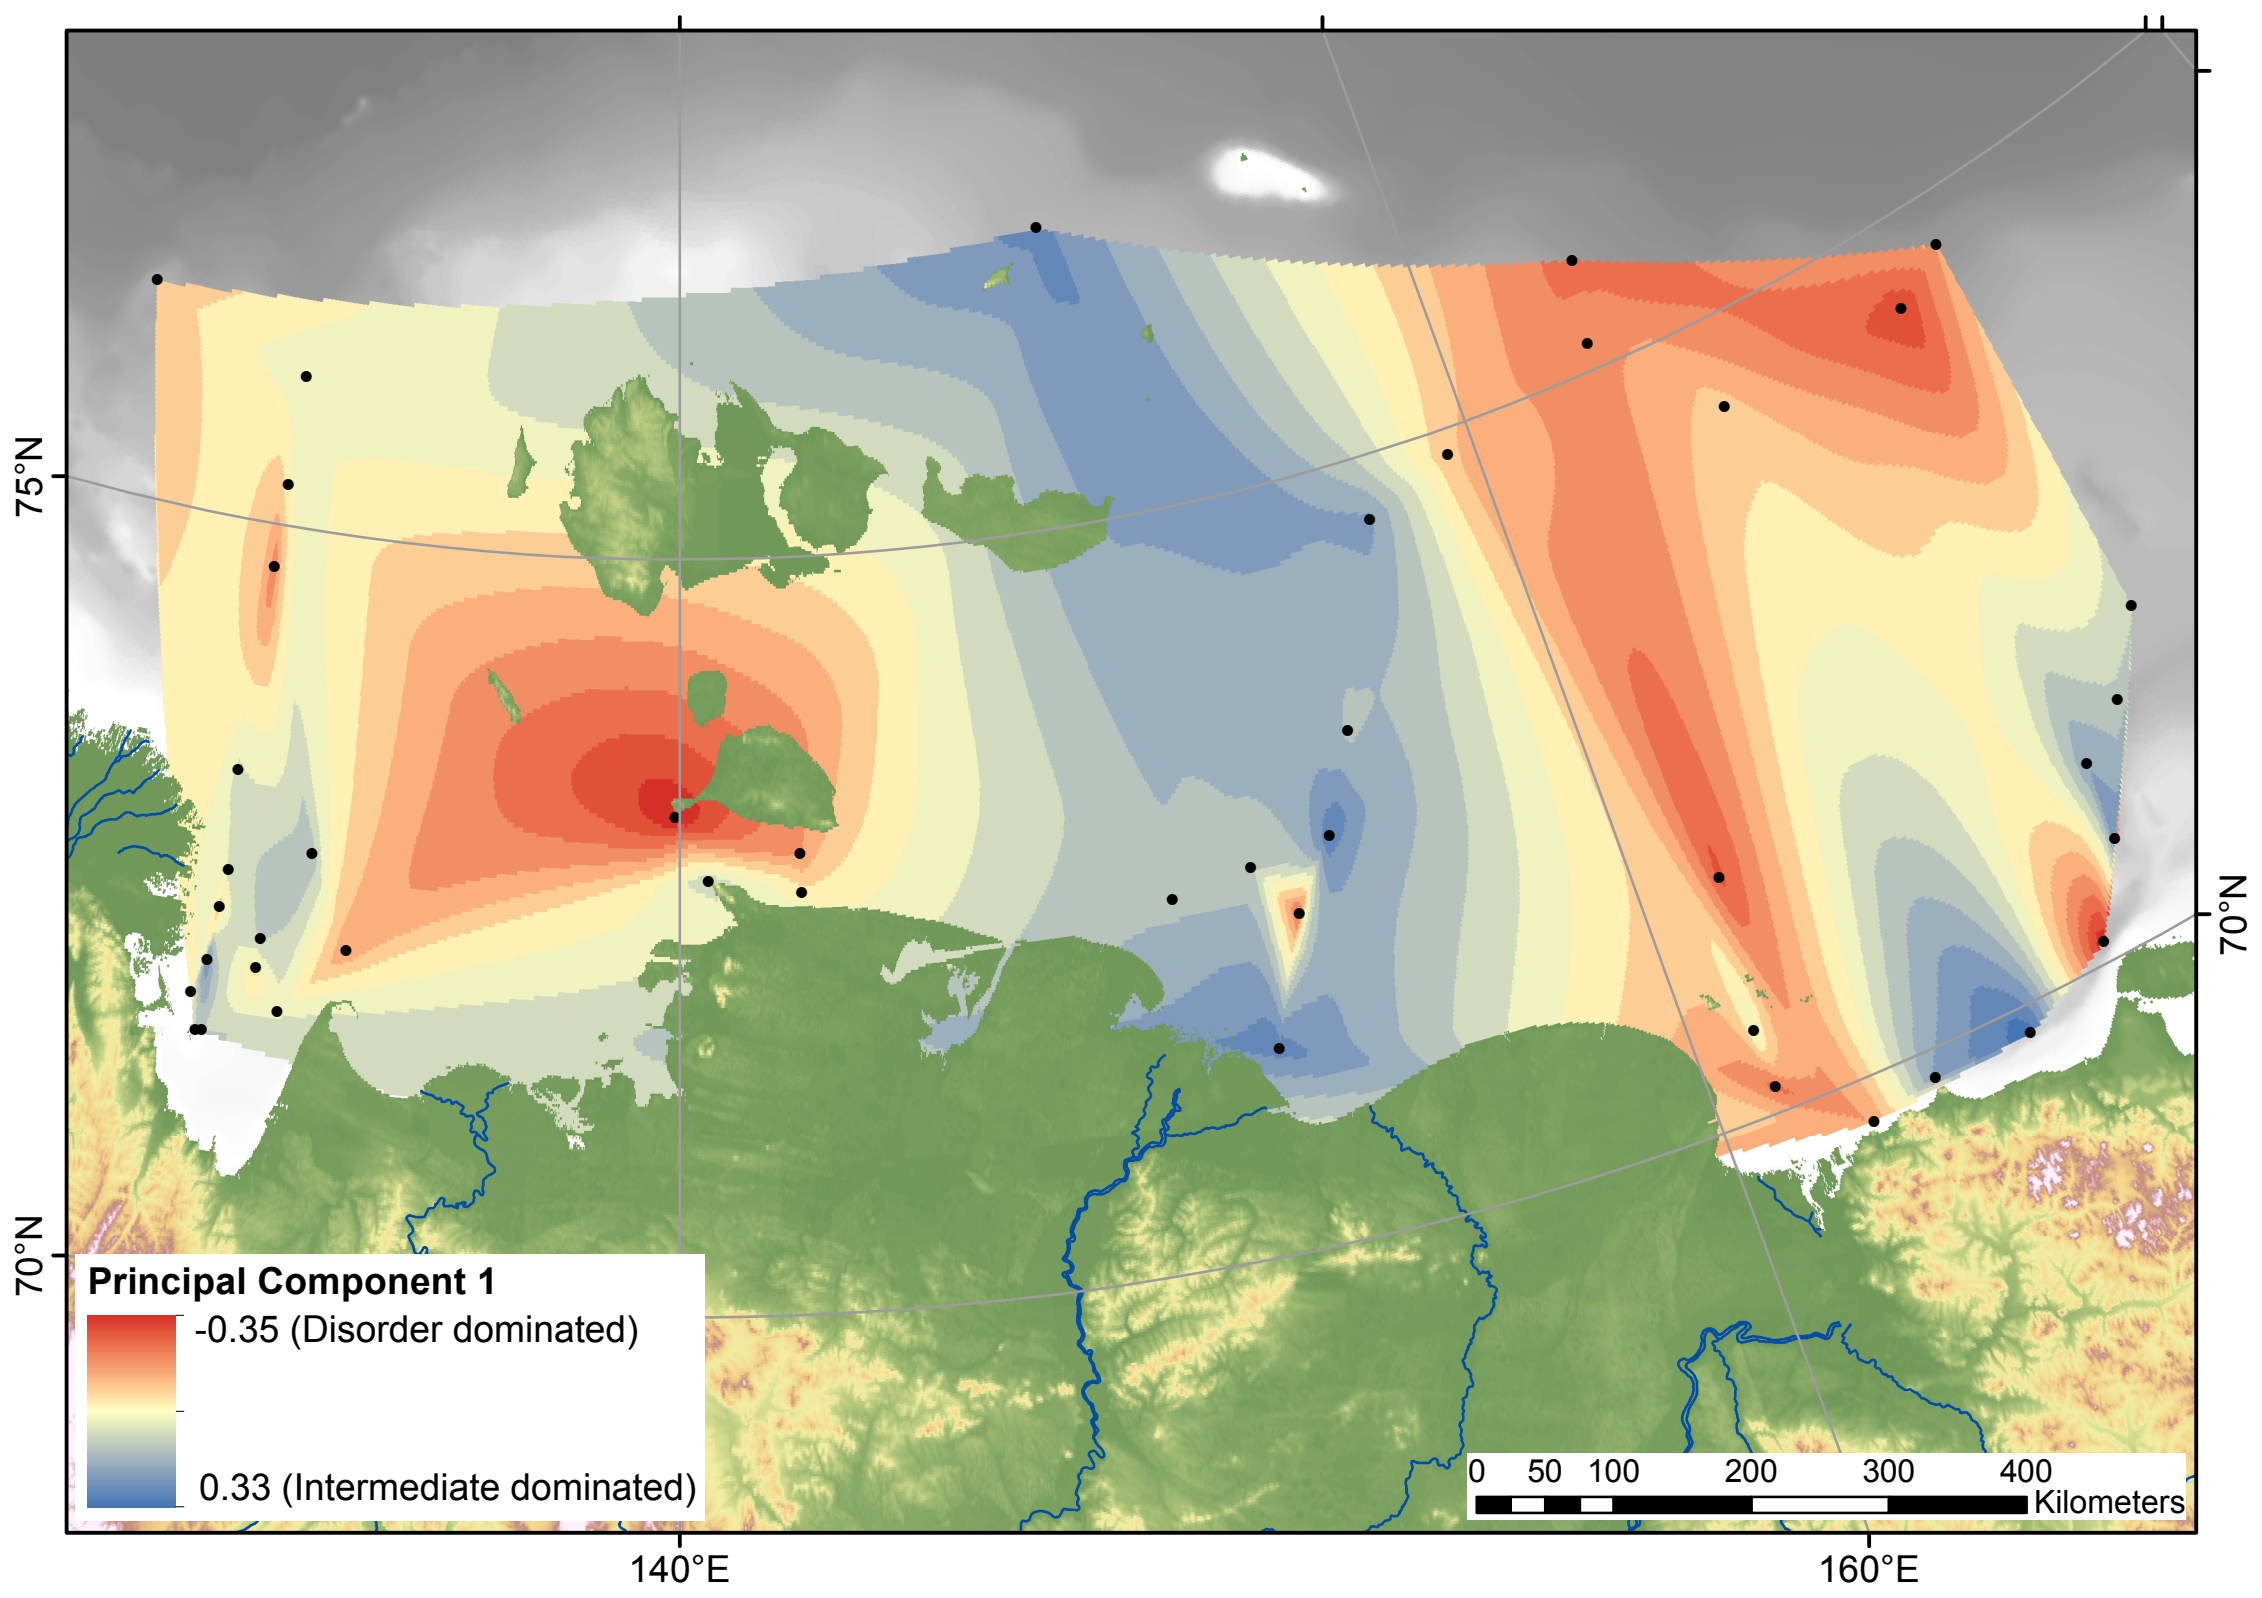

Supplement: Supplementary file 2 [file tc-12-3293-2018-supplement.zip]
